# Supplementary material for: Preoperative Biliary Drainage for Cancer of the Head of the Pancreas
Source: Atypon-hosted journal article supplement (doi:10.1056/nejmoa0903230), 2010-01-13
Supplement: nejm_van_der_gaag_129sa1.pdf [file nejm_van_der_gaag_129sa1.pdf]

## Supplementary Appendix

This appendix has been provided by the authors to give readers additional information about their work.

Supplement to: van der Gaag NA, Rauws EAJ, van Eijck CHJ, et al. Preoperative biliary drainage for cancer of the head of the pancreas. *N Engl J Med* 2010;362:129-37.

(PDF updated January 15, 2010.)

**Table 1** shows the definitions of complications related to the PBD procedure or surgical treatment.

| <b>Severe PBD- and surgery-related complications.</b> |                                                                                                                                                                                                                                                                       |
|-------------------------------------------------------|-----------------------------------------------------------------------------------------------------------------------------------------------------------------------------------------------------------------------------------------------------------------------|
| <b>Complication</b>                                   | <b>Criteria</b>                                                                                                                                                                                                                                                       |
| <b>Specific PBD (ERCP, PTC) related</b>               |                                                                                                                                                                                                                                                                       |
| Acute pancreatitis                                    | Abdominal pain and a serum concentration of pancreatic enzymes (amylase or lipase) three or more times the upper limit of normal, that required more than one night of hospitalization                                                                                |
| Acute cholecystitis                                   | No suggestive clinical or radiographic signs of acute cholecystitis before the procedure and if emergency cholecystectomy is subsequently required                                                                                                                    |
| Perforation                                           | Retroperitoneal or bowel-wall perforation documented by any radiographic technique or direct visual evidence                                                                                                                                                          |
| Stent Occlusion                                       | Recurring obstructive jaundice with necessary stent replacement                                                                                                                                                                                                       |
| <b>Specific surgery related</b>                       |                                                                                                                                                                                                                                                                       |
| Pancreaticojejunostomy leakage                        | Drain output of any measurable volume of fluid on or after postoperative day 3 with an amylase content greater than 3 times the serum amylase activity, graded according to clinical course (ISGPS grade A, B, C), or direct visual evidence of defect at anastomosis |
| Delayed gastric emptying                              | Gastric stasis requiring nasogastric intubation for 10 days or more, or the inability to tolerate a regular (solid) diet on or before the fourteenth postoperative day, not due to sequelae of intra-abdominal complications (i.e. abscess, anastomotic leakage)      |
| Biliary leakage                                       | Bilirubin in abdominal drain or dehiscence found at laparotomy                                                                                                                                                                                                        |
| Gastro-/duodenojejunostomy leakage                    | Conclusive radiographic or direct visual evidence of a defect of the anastomosis                                                                                                                                                                                      |
| Intra-abdominal abscess formation                     | Intra-abdominal fluid collection with positive cultures identified by ultrasonography or computed tomography, associated with persistent fever and elevations of white blood cells                                                                                    |
| Wound infection                                       | Requiring intervention otherwise considered as minor complication                                                                                                                                                                                                     |
| Portal Vein Thrombosis                                | Conclusive radiologic evidence of thrombosis                                                                                                                                                                                                                          |
| <b>Following either procedure</b>                     |                                                                                                                                                                                                                                                                       |
| Cholangitis                                           | Elevation in temperature more than 38°C, thought to have a biliary cause, without concomitant evidence of acute cholecystitis, requiring intervention                                                                                                                 |
| Hemorrhage                                            | Bleeding after the index procedure requiring transfusion of ≥4 units of packed cells within a 24-hour period, or leading to relaparotomy/intervention                                                                                                                 |
| (Emergency) (re)laparotomy                            | Any (other) reason following either preoperative biliary drainage or another surgical procedure                                                                                                                                                                       |
| Pneumonia                                             | Pulmonary infection with radiological confirmation and requiring antibiotic treatment                                                                                                                                                                                 |
| Mortality                                             | In-hospital death, due to protocol complications or any cause, including progression of disease, within the study period                                                                                                                                              |

**Table 2** shows procedure characteristics for both groups.

| <b>Procedure characteristics.*</b>       |                                 |                   |                                                      |           |
|------------------------------------------|---------------------------------|-------------------|------------------------------------------------------|-----------|
| <b>Characteristic</b>                    | <b>Early surgery<br/>(N=94)</b> |                   | <b>Preoperative Biliary<br/>Drainage<br/>(N=102)</b> |           |
| Conversion to PBD — no. (%)              | 5                               | (5)               | NA                                                   |           |
| Initial PBD attempt successful — no. (%) | 4                               | (80) <sup>†</sup> | 77                                                   | (75)      |
| PTC as final PBD procedure               | -                               |                   | 12                                                   | (12)      |
| Underwent PBD — no. (%)                  | 5                               | (5)               | 96                                                   | (94)      |
| Time to surgery — wk                     |                                 |                   |                                                      |           |
| Mean (95% CI)                            | 1.2                             | (0.9-1.4)         | 5.2                                                  | (4.8-5.5) |
| Median                                   | 1.0                             |                   | 4.9                                                  |           |
| IQR                                      | 0.7                             | - 1.1             | 4.1                                                  | - 6.0     |
| Underwent surgery — no. (%)              | 92                              | (98)              | 95                                                   | (93)      |
| Type of surgical treatment — no. (%)     |                                 |                   |                                                      |           |
| Resection                                | 63                              | (67)              | 57                                                   | (56)      |
| Palliative bypass procedure              | 28                              | (30)              | 33                                                   | (32)      |
| Exploration                              | 1                               | (1)               | 5                                                    | (5)       |

\* for each variable the number of patients are indicated. CI denotes confidence interval.

NA denotes not applicable, IQR interquartile range.

<sup>†</sup> percentage of total number of patients that underwent PBD

## CASE RECORD FORM

---

Preoperative biliary drainage vs. (direct) operation for patients with a pancreatic/periampullary tumor

*CRF, (English version)*

---

*Signature physician/researcher/data manager*

Herewith I declare I have completed this Case Record Form to my best knowledge and that the information entered is correct.

| Name physician/researcher | Signature | Date |   |   |   |   |   |   |   |
|---------------------------|-----------|------|---|---|---|---|---|---|---|
|                           |           | d    | d | m | m | y | y | y | y |
|                           |           |      |   |   |   |   |   |   |   |

## PERSONALIA

---

Date registration: \_\_\_\_\_

Gender : 1 = male, 2 = female

CRF Number: \_\_\_\_\_

Date of birth: \_\_\_\_\_

Hospital File Number: \_\_\_\_\_

### INCLUSION CRITERIA

0=No, 1=Yes

1. Clinical diagnosis of jaundice due to suspected pancreatic/periampullary tumor
2. Serum bilirubin  $\leq 40 \mu\text{mol/l}$  and  $\geq 250 \mu\text{mol/l}$
3. Spiral CT-scan without signs of distant metastases or loco regional (vascular) ingrowth

|  |
|--|
|  |
|  |
|  |

***In case the answer to one of these questions is NO the patient cannot enter the trial***

### EXCLUSION CRITERIA

0=No, 1=Yes

1. Age >85 year or severe co morbidity (Karnofsky <50, see next page)
2. Current cholangitis?
3. Prior biliary drainage by means of ERCP/PTC?
4. Did the patient receive neoadjuvant or palliative chemotherapy for current malignancy?
5. Symptoms of 'gastric outlet obstruction' occur ? (Nausea/vomiting, nutritional intake < 1l/day)

|  |
|--|
|  |
|  |
|  |
|  |
|  |

***In case the answer to one of these questions is YES the patient cannot enter the trial***

**KARNOFSKY SCORE** *(please encircle the correct answer)*

|       |                                                                     |
|-------|---------------------------------------------------------------------|
| 100   | Normal, no complaints, no evidence of disease                       |
| 90    | Able to carry on normal activity: minor symptoms of disease         |
| 80    | Normal activity with effort: some symptoms of disease               |
| <hr/> |                                                                     |
| 70    | Cares for self: unable to carry on normal activity or active work   |
| 60    | Requires occasional assistance but is able to care for Nods         |
| 50    | Requires considerable assistance and frequent medical care          |
| <hr/> |                                                                     |
| 40    | Disabled: requires special care and assistance                      |
| 30    | Severely disabled: hospitalization is indicated, death not imminent |
| 20    | Very sick, hospitalization necessary: active treatment necessary    |
| 10    | Moribund, fatal processes progressing rapidly                       |
| 0     | Dead                                                                |

## PRIOR SURGICAL TREATMENT

Did the patient undergo earlier HPB surgery?

0= No

1= Yes (please specify)

| Surgical procedure | Date |   |   |   |   |   |   |   |
|--------------------|------|---|---|---|---|---|---|---|
|                    | d    | d | m | m | y | y | y | y |
| 1.                 |      |   |   |   |   |   |   |   |
| 2.                 |      |   |   |   |   |   |   |   |
| 3.                 |      |   |   |   |   |   |   |   |

## RELEVANT MEDICAL HISTORY

Any other illnesses?

0= No

1= Yes (please specify)

| Diagnosis | Present since<br>(year) |  |  |  | cross mark     |        |
|-----------|-------------------------|--|--|--|----------------|--------|
|           |                         |  |  |  | In the<br>past | Actual |
| 1.        |                         |  |  |  |                |        |
| 2.        |                         |  |  |  |                |        |
| 3.        |                         |  |  |  |                |        |
| 4.        |                         |  |  |  |                |        |
| 5.        |                         |  |  |  |                |        |
| 6.        |                         |  |  |  |                |        |
| 7.        |                         |  |  |  |                |        |
| 8.        |                         |  |  |  |                |        |
| 9.        |                         |  |  |  |                |        |
| 10.       |                         |  |  |  |                |        |

## PERFORMANCE STATUS

ECOG-WHO Scale (shortly before randomization)

0= WHO 0: Asymptomatic

1= WHO 1: Symptomatic but completely ambulant

2= WHO 2: Symptomatic, <50% in bed during the day

3= WHO 3: Symptomatic, >50% in bed, but not bedbound

4= WHO 4: Bedbound



**PHYSICAL EXAMINATION:**

|                    |  |  |  |   |  |
|--------------------|--|--|--|---|--|
| <b>Length (cm)</b> |  |  |  | , |  |
| <b>Weight (kg)</b> |  |  |  | , |  |

- **Gallbladder palpable**

0= No  
1= Yes  
-7= Unknown

## BLOOD INVESTIGATIONS

- Hemoglobin \_\_\_\_\_ mmol/l
- ASAT (SGOT) \_\_\_\_\_ U/l
- ALAT (SGPT) \_\_\_\_\_ U/l
- Bilirubin (total) \_\_\_\_\_  $\mu\text{mol/l}$
- Bilirubin (direct) \_\_\_\_\_  $\mu\text{mol/l}$
- Alkalic fosfatase \_\_\_\_\_ U/l
- $\gamma$ -GT \_\_\_\_\_ U/l
- Kreatinin \_\_\_\_\_  $\mu\text{mol/l}$
- APTT \_\_\_\_\_ sec.
- PT \_\_\_\_\_ sec.
- INR \_\_\_\_\_
- Leukocytes \_\_\_\_\_  $10^9/l$
- CRP \_\_\_\_\_ mg/l
- Amylase \_\_\_\_\_ U/l
- Albumin \_\_\_\_\_ g/l

## PREOPERATIVE DIAGNOSTICS

**Modality**      **Available**      **Date**      **Tumor size in cm**      **Dilatation Pancreatic Duct**      **Dilatation CBD**  
 0=No, 1=Yes      0=No, 1=Yes      0=No, 1=Yes

|            |                          | d | d | m | m | y | y | y | y |       |                          |                          |
|------------|--------------------------|---|---|---|---|---|---|---|---|-------|--------------------------|--------------------------|
| CT-scan    | <input type="checkbox"/> |   |   |   |   |   |   |   |   | _____ | <input type="checkbox"/> | <input type="checkbox"/> |
| Ultrasound | <input type="checkbox"/> |   |   |   |   |   |   |   |   | _____ | <input type="checkbox"/> | <input type="checkbox"/> |
| MRCP       | <input type="checkbox"/> |   |   |   |   |   |   |   |   | _____ | <input type="checkbox"/> | <input type="checkbox"/> |

other, viz \_\_\_\_\_

## TUMOUR LOCALISATION

- 1= Pancreatic Head
- 2= Ampulla of Vater
- 3= Distal bile duct
- 4= other, viz \_\_\_\_\_

## OTHER DIAGNOSTICS / PREOPERATIVE PATHOLOGY

| Modality | Available<br>0=No, 1=Yes | Date |   |   |   |   |   |   |   | Result |
|----------|--------------------------|------|---|---|---|---|---|---|---|--------|
|          |                          | d    | d | m | m | y | y | y | y |        |
| X-Thorax | <input type="checkbox"/> |      |   |   |   |   |   |   |   | _____  |
| Biopsy   | <input type="checkbox"/> |      |   |   |   |   |   |   |   | _____  |
| Brush    | <input type="checkbox"/> |      |   |   |   |   |   |   |   | _____  |
| _____    | <input type="checkbox"/> |      |   |   |   |   |   |   |   | _____  |
| _____    | <input type="checkbox"/> |      |   |   |   |   |   |   |   | _____  |

## MEDICATION PREOPERATIVE

**Name**

**Dosage**

|         |       |
|---------|-------|
| - _____ | _____ |
| - _____ | _____ |
| - _____ | _____ |
| - _____ | _____ |
| - _____ | _____ |
| - _____ | _____ |
| - _____ | _____ |
| - _____ | _____ |
| - _____ | _____ |
| - _____ | _____ |
| - _____ | _____ |
| - _____ | _____ |
| - _____ | _____ |
| - _____ | _____ |
| - _____ | _____ |
| - _____ | _____ |

**RANDOMISATION**

Only after obtaining informed consent the patient will be randomized:

- **Randomization performed?**  
If no, please specify

0= No  
1= Yes

No : \_\_\_\_\_  
\_\_\_\_\_

- **Date of randomization**

| Date |   |   |   |   |   |   |   |
|------|---|---|---|---|---|---|---|
| d    | d | m | m | y | y | y | y |
|      |   |   |   |   |   |   |   |

- *Result*

1= Preoperative Biliary Drainage 4-6 weeks  
2= Early Surgery (< 1 week after randomization)

**PLEASE PROCEED TO PAGE 17  
FOR EARLY SURGERY**

## PREOPERATIVE BILIARY DRAINAGE

- **Antibiotic prophylaxis**

 0= No  
 1= Yes  
 -7= Unknown
- **ERCP**

 0= No  
 1= Yes  
 -7= Unknown
- **Sphincterotomy**

 0= No  
 1= Routine  
 2= Pre-cut  
 -7= Unknown
- **Stent placement effective**  
*(unsuccessful? Please see page 14)*

 0= No  
 1= Yes  
 -7= Unknown
- **Reason of stent placement failure**
- **Length of procedure**

 \_\_\_\_\_hr    \_\_\_\_\_min
- **Number of stents placed**
- **Biliary Drainage started on:**

| Date |   |   |   |   |   |   |   |
|------|---|---|---|---|---|---|---|
| d    | d | m | m | y | y | y | y |
|      |   |   |   |   |   |   |   |
- **Bilirubin (after 2 weeks of drainage)**

 \_\_\_\_\_  $\mu$ mol/l
- **Successful drainage**  
*(defined as: >50% decrease of serum bilirubin after 2 weeks)*

 0= No  
 1= Yes  
 -7= Unknown
- **Stent replacement?**

 0= No  
 1= Yes  
 -7= Unknown

- **Date stent occlusion**

| Date (1 <sup>st</sup> occlusion) |   |   |   |   |   |   | Date (2 <sup>nd</sup> occlusion) |   |   |   |   |   |   |   |   |
|----------------------------------|---|---|---|---|---|---|----------------------------------|---|---|---|---|---|---|---|---|
| d                                | d | m | m | y | y | y | y                                | d | d | m | m | y | y | y | y |
|                                  |   |   |   |   |   |   |                                  |   |   |   |   |   |   |   |   |

- **Date stent replacement**

| Date (1 <sup>st</sup> replacement) |   |   |   |   |   |   | Date (2 <sup>nd</sup> replacement) |   |   |   |   |   |   |   |   |
|------------------------------------|---|---|---|---|---|---|------------------------------------|---|---|---|---|---|---|---|---|
| d                                  | d | m | m | y | y | y | y                                  | d | d | m | m | y | y | y | y |
|                                    |   |   |   |   |   |   |                                    |   |   |   |   |   |   |   |   |

## PREOPERATIVE BILIARY DRAINAGE (2nd attempt)

- **Antibiotic prophylaxis**

 0= No  
 1= Yes  
 -7= Unknown
- **ERCP**

 0= No  
 1= Yes  
 -7= Unknown
- **Sphincterotomy**

 0= No  
 1= Routine  
 2= Pre-cut  
 -7= Unknown
- **Stent placement effective**  
*(unsuccessful? Please see page 14)*

 0= No  
 1= Yes  
 -7= Unknown
- **Reason of stent placement failure**
- **Length of procedure**
\_\_\_\_\_ hr    \_\_\_\_\_ min.
- **Number of stents placed**
- **Biliary Drainage started on:**

| Date |   |   |   |   |   |   |   |
|------|---|---|---|---|---|---|---|
| d    | d | m | m | y | y | y | y |
|      |   |   |   |   |   |   |   |
- **Bilirubin (after 2 weeks of drainage)**
\_\_\_\_\_  $\mu$ mol/l
- **Successful drainage**  
*(defined as: >50% decrease of serum bilirubin after 2 weeks)*

 0= No  
 1= Yes  
 -7= Unknown
- **Stent replacement?**

 0= No  
 1= Yes  
 -7= Unknown

- **Date stent occlusion**

| <b>Date (1<sup>st</sup> occlusion)</b> |   |   |   |   |   |   | <b>Date (2<sup>nd</sup> occlusion)</b> |   |   |   |   |   |   |   |   |
|----------------------------------------|---|---|---|---|---|---|----------------------------------------|---|---|---|---|---|---|---|---|
| d                                      | d | m | m | y | y | y | y                                      | d | d | m | m | y | y | y | y |
|                                        |   |   |   |   |   |   |                                        |   |   |   |   |   |   |   |   |

- **Date stent replacement**

| <b>Date (1<sup>st</sup> replacement)</b> |   |   |   |   |   |   | <b>Date (2<sup>nd</sup> replacement)</b> |   |   |   |   |   |   |   |   |
|------------------------------------------|---|---|---|---|---|---|------------------------------------------|---|---|---|---|---|---|---|---|
| d                                        | d | m | m | y | y | y | y                                        | d | d | m | m | y | y | y | y |
|                                          |   |   |   |   |   |   |                                          |   |   |   |   |   |   |   |   |

## COMPLICATIONS OF PREOPERATIVE BILIARY DRAINAGE

| Complication    | Present<br>0= No,<br>1= Yes | Start Date |   |   |   |   |   |   |   | Stop Date |   |   |   |   |   |   |   | Therapy<br>(a) | Outcome<br>(b) |
|-----------------|-----------------------------|------------|---|---|---|---|---|---|---|-----------|---|---|---|---|---|---|---|----------------|----------------|
|                 |                             | d          | d | m | m | y | y | y | y | d         | d | m | m | y | y | y | y |                |                |
| 1. Perforation  |                             |            |   |   |   |   |   |   |   |           |   |   |   |   |   |   |   |                |                |
| 2. Cholangitis  |                             |            |   |   |   |   |   |   |   |           |   |   |   |   |   |   |   |                |                |
| 3. Hemorrhage   |                             |            |   |   |   |   |   |   |   |           |   |   |   |   |   |   |   |                |                |
| 4. Pancreatitis |                             |            |   |   |   |   |   |   |   |           |   |   |   |   |   |   |   |                |                |
| 5.              |                             |            |   |   |   |   |   |   |   |           |   |   |   |   |   |   |   |                |                |

- (a)
- Laparotomy with ICU admission
  - Laparotomy without ICU admission
  - Conservative treatment with ICU admission
  - Conservative treatment without ICU admission

- (b)
- cured
  - permanent damage
  - died from complication
  - other, viz \_\_\_\_\_

Number of laparotomies \_\_\_\_\_

|                     | Date |   |   |   |   |   |   |   |
|---------------------|------|---|---|---|---|---|---|---|
|                     | d    | d | m | m | y | y | y | y |
| Date relaparotomy 1 |      |   |   |   |   |   |   |   |
| Date relaparotomy 2 |      |   |   |   |   |   |   |   |
| Date relaparotomy 3 |      |   |   |   |   |   |   |   |
| Date of death       |      |   |   |   |   |   |   |   |

**SURGERY DATA**

- **Date of surgery**

| Date |   |   |   |   |   |   |   |
|------|---|---|---|---|---|---|---|
| d    | d | m | m | y | y | y | y |
|      |   |   |   |   |   |   |   |

- **Antibiotic prophylaxis**

0= No  
1= Yes (please specify)  
-7= Unknown

| Antibiotic | Dosage | Administration | Date |   |   |   |   |   |   |   | Duration<br>Days |
|------------|--------|----------------|------|---|---|---|---|---|---|---|------------------|
|            |        |                | d    | d | m | m | y | y | y | y |                  |
| 1.         |        |                |      |   |   |   |   |   |   |   |                  |
| 2.         |        |                |      |   |   |   |   |   |   |   |                  |
| 3.         |        |                |      |   |   |   |   |   |   |   |                  |

- **Octreotide (Sandostatin®) used**

0= No  
1= Yes  
-7= Unknown

- **Operator**

1= Surgeon  
2= Fellow  
3= Resident  
-7= Unknown

- **Tumor resectable**

0= No  
1= Yes  
-7= Unknown

- **Reason unresectability**  
(in case of unresectability)

1= Metastases  
2= Loco regional ingrowth  
3= n/a  
-7= Unknown

- **Bypass (hepaticojejunostomy)**  
(in case of unresectability)

0= No  
1= Yes  
2= Yes, + gastroenterostomy  
3= n/a  
-7= Unknown

- **Celiac plexus neurolysis**  
(in case of unresectability)

0= No  
1= Yes  
3= n/a  
-7= Unknown

- **Type of operation / Resection**

0= No  
 1= PPPD  
 2= PD  
 3= Unknown  
 4=Other, viz \_\_\_\_\_
- **Vascular resection**

0= No  
 1= Vena porta  
 2= Vena mesenterica  
 3= Confluens  
 -7= Unknown
- **Feeding jejunostomy**

0= No  
 1= Yes  
 -7= Unknown
- **Length of operation**

\_\_\_\_\_hr    \_\_\_\_\_min
- **Blood loss**

\_\_\_\_\_ml
- **Perioperative blood transfusion**

\_\_\_\_\_ packed cells
- **Postoperative stay**

1= Ward  
 2= ICU or recovery room  
 3= Other, viz \_\_\_\_\_  
 -7= Unknown



## POSTOPERATIVE COMPLICATIONS

| Complication                | Present<br>0= No, 1=<br>Yes | Start Date |   |   |   |   |   |   |   | Stop Date |   |   |   |   |   |   |   | Therapy<br>(a) | Outcome<br>(b) |
|-----------------------------|-----------------------------|------------|---|---|---|---|---|---|---|-----------|---|---|---|---|---|---|---|----------------|----------------|
|                             |                             | d          | d | m | m | y | y | y | y | d         | d | m | m | y | y | y | y |                |                |
| 1. Wound infection          |                             |            |   |   |   |   |   |   |   |           |   |   |   |   |   |   |   |                |                |
| 2. Peritonitis              |                             |            |   |   |   |   |   |   |   |           |   |   |   |   |   |   |   |                |                |
| 3. Pancreatic fistula       |                             |            |   |   |   |   |   |   |   |           |   |   |   |   |   |   |   |                |                |
| 4. Biliary leakage          |                             |            |   |   |   |   |   |   |   |           |   |   |   |   |   |   |   |                |                |
| 5. Hemorrhage               |                             |            |   |   |   |   |   |   |   |           |   |   |   |   |   |   |   |                |                |
| 5. Delayed Gastric Emptying |                             |            |   |   |   |   |   |   |   |           |   |   |   |   |   |   |   |                |                |
| 6. Intra-abdominal abscess  |                             |            |   |   |   |   |   |   |   |           |   |   |   |   |   |   |   |                |                |
| 7. Wound dehiscence         |                             |            |   |   |   |   |   |   |   |           |   |   |   |   |   |   |   |                |                |
| 8. Portal vein thrombosis   |                             |            |   |   |   |   |   |   |   |           |   |   |   |   |   |   |   |                |                |
| 9. Deep venous thrombosis   |                             |            |   |   |   |   |   |   |   |           |   |   |   |   |   |   |   |                |                |
| 10. UTI                     |                             |            |   |   |   |   |   |   |   |           |   |   |   |   |   |   |   |                |                |
| 11. Pneumonia               |                             |            |   |   |   |   |   |   |   |           |   |   |   |   |   |   |   |                |                |
| 12. Myocardial infarction   |                             |            |   |   |   |   |   |   |   |           |   |   |   |   |   |   |   |                |                |
| 13. CVA                     |                             |            |   |   |   |   |   |   |   |           |   |   |   |   |   |   |   |                |                |
| 14. _____                   |                             |            |   |   |   |   |   |   |   |           |   |   |   |   |   |   |   |                |                |
| 15. _____                   |                             |            |   |   |   |   |   |   |   |           |   |   |   |   |   |   |   |                |                |

- (a)
1. Laparotomy with ICU admission
  2. Laparotomy without ICU admission
  3. Conservative treatment with ICU admission
  4. Conservative treatment without ICU admission

- (b)
1. cured
  2. permanent damage
  3. died from complication
  4. other, viz \_\_\_\_\_

Number of relaparotomies \_\_\_\_\_

|                     | Date |   |   |   |   |   |   |   |
|---------------------|------|---|---|---|---|---|---|---|
|                     | d    | d | m | m | y | y | y | y |
| Date relaparotomy 1 |      |   |   |   |   |   |   |   |
| Date relaparotomy 2 |      |   |   |   |   |   |   |   |
| Date relaparotomy 3 |      |   |   |   |   |   |   |   |
| Date of death       |      |   |   |   |   |   |   |   |

**DISCHARGE**

- Date

| Date |   |   |   |   |   |   |   |
|------|---|---|---|---|---|---|---|
| d    | d | m | m | y | y | y | y |
|      |   |   |   |   |   |   |   |

**READMISSION**

- Within 30 days after discharge?

0= No

1= Yes (please mention date)

- Reason of readmission \_\_\_\_\_

- Date of readmission

- Date of discharge

| Date |   |   |   |   |   |   |   |
|------|---|---|---|---|---|---|---|
| d    | d | m | m | y | y | y | y |
|      |   |   |   |   |   |   |   |
|      |   |   |   |   |   |   |   |

- Did the patient die during readmission?

0= No

1= Yes (please add date)

| Date |   |   |   |   |   |   |   |
|------|---|---|---|---|---|---|---|
| d    | d | m | m | y | y | y | y |
|      |   |   |   |   |   |   |   |

## MEDICATION AT DISCHARGE

| Name    | Dose  |
|---------|-------|
| - _____ | _____ |
| - _____ | _____ |
| - _____ | _____ |
| - _____ | _____ |
| - _____ | _____ |
| - _____ | _____ |
| - _____ | _____ |
| - _____ | _____ |
| - _____ | _____ |
| - _____ | _____ |
| - _____ | _____ |
| - _____ | _____ |
| - _____ | _____ |
| - _____ | _____ |
| - _____ | _____ |
| - _____ | _____ |

***PATHOLOGY***

***Pathology number***

|  |  |  |  |  |  |  |  |  |  |
|--|--|--|--|--|--|--|--|--|--|
|  |  |  |  |  |  |  |  |  |  |
|--|--|--|--|--|--|--|--|--|--|

- **Tumor type**

1= Adenocarcinoma

2= Adenoma

3= Neuroendocrine

4= Cystadenoma

5= Cystadenocarcinoma

6= No tumor

8= Chronic pancreatitis

7= Other, viz \_\_\_\_\_

- **Tumor size**

Centimeter (cm)

|  |  |   |  |
|--|--|---|--|
|  |  | , |  |
|--|--|---|--|

- **Differentiation**

1= Poor

2= Poor-moderate

3= Moderate

4= Moderate - well

5= Well

6= Other, viz \_\_\_\_\_

- **Lymphovascular ingrowth**

0= No

1= Yes

-7= Unknown

- **Perineural ingrowth**

0= No

1= Yes

-7= Unknown

- **Anterior surface resection margin free**

0= No

1= Yes

-7= Unknown

|                                                                                             |                                                                                                                                                                                                                                                                                                                                                                                                                                                                                                    |                                                                                                                                                                                                                                   |           |           |                                                         |                                                         |                                                         |  |
|---------------------------------------------------------------------------------------------|----------------------------------------------------------------------------------------------------------------------------------------------------------------------------------------------------------------------------------------------------------------------------------------------------------------------------------------------------------------------------------------------------------------------------------------------------------------------------------------------------|-----------------------------------------------------------------------------------------------------------------------------------------------------------------------------------------------------------------------------------|-----------|-----------|---------------------------------------------------------|---------------------------------------------------------|---------------------------------------------------------|--|
| - <b>Pancreatic neck/body transection margin free</b>                                       | 0= No<br>1= Yes<br>-7= Unknown                                                                                                                                                                                                                                                                                                                                                                                                                                                                     | <input style="width: 40px; height: 20px;" type="text"/>                                                                                                                                                                           |           |           |                                                         |                                                         |                                                         |  |
| - <b>Distal duodenal transection margin free</b>                                            | 0= No<br>1= Yes<br>-7= Unknown                                                                                                                                                                                                                                                                                                                                                                                                                                                                     | <input style="width: 40px; height: 20px;" type="text"/>                                                                                                                                                                           |           |           |                                                         |                                                         |                                                         |  |
| - <b>Proximal gastric/duodenal transection margin free</b>                                  | 0= No<br>1= Yes<br>-7= Unknown                                                                                                                                                                                                                                                                                                                                                                                                                                                                     | <input style="width: 40px; height: 20px;" type="text"/>                                                                                                                                                                           |           |           |                                                         |                                                         |                                                         |  |
| - <b>Common bile duct transection margin free</b>                                           | 0= No<br>1= Yes<br>-7= Unknown                                                                                                                                                                                                                                                                                                                                                                                                                                                                     | <input style="width: 40px; height: 20px;" type="text"/>                                                                                                                                                                           |           |           |                                                         |                                                         |                                                         |  |
| - <b>Along SMV groove (medial, uncinate, retroperitoneal) surface resection margin free</b> | 0= No<br>1= Yes<br>-7= Unknown                                                                                                                                                                                                                                                                                                                                                                                                                                                                     | <input style="width: 40px; height: 20px;" type="text"/>                                                                                                                                                                           |           |           |                                                         |                                                         |                                                         |  |
| - <b>Posterior surface resection margin free</b>                                            | 0= No<br>1= Yes<br>-7= Unknown                                                                                                                                                                                                                                                                                                                                                                                                                                                                     | <input style="width: 40px; height: 20px;" type="text"/>                                                                                                                                                                           |           |           |                                                         |                                                         |                                                         |  |
| - <b>Number of lymph nodes investigated</b>                                                 |                                                                                                                                                                                                                                                                                                                                                                                                                                                                                                    | <table border="1" style="display: inline-table; border-collapse: collapse;"><tr><td style="width: 30px; height: 20px;"></td><td style="width: 30px; height: 20px;"></td><td style="width: 30px; height: 20px;"></td></tr></table> |           |           |                                                         |                                                         |                                                         |  |
|                                                                                             |                                                                                                                                                                                                                                                                                                                                                                                                                                                                                                    |                                                                                                                                                                                                                                   |           |           |                                                         |                                                         |                                                         |  |
| - <b>Number of (tumor) positive lymph nodes</b>                                             |                                                                                                                                                                                                                                                                                                                                                                                                                                                                                                    | <table border="1" style="display: inline-table; border-collapse: collapse;"><tr><td style="width: 30px; height: 20px;"></td><td style="width: 30px; height: 20px;"></td><td style="width: 30px; height: 20px;"></td></tr></table> |           |           |                                                         |                                                         |                                                         |  |
|                                                                                             |                                                                                                                                                                                                                                                                                                                                                                                                                                                                                                    |                                                                                                                                                                                                                                   |           |           |                                                         |                                                         |                                                         |  |
| - <b>Radicality</b>                                                                         | 1= R0 (micro- & macroscopic radical resection)<br>2= R1 (macroscopic radical, microscopic residual)<br>3= R2 (micro- & macroscopic residual)<br>-7= Unknown                                                                                                                                                                                                                                                                                                                                        | <input style="width: 40px; height: 20px;" type="text"/>                                                                                                                                                                           |           |           |                                                         |                                                         |                                                         |  |
| - <b>TNM Classification (pathology)</b>                                                     | <table border="0" style="margin: auto;"> <tr> <td style="padding: 0 10px;"><b>pT</b></td> <td style="padding: 0 10px;"><b>pN</b></td> <td style="padding: 0 10px;"><b>pM</b></td> </tr> <tr> <td style="text-align: center;"><input style="width: 40px; height: 20px;" type="text"/></td> <td style="text-align: center;"><input style="width: 40px; height: 20px;" type="text"/></td> <td style="text-align: center;"><input style="width: 40px; height: 20px;" type="text"/></td> </tr> </table> | <b>pT</b>                                                                                                                                                                                                                         | <b>pN</b> | <b>pM</b> | <input style="width: 40px; height: 20px;" type="text"/> | <input style="width: 40px; height: 20px;" type="text"/> | <input style="width: 40px; height: 20px;" type="text"/> |  |
| <b>pT</b>                                                                                   | <b>pN</b>                                                                                                                                                                                                                                                                                                                                                                                                                                                                                          | <b>pM</b>                                                                                                                                                                                                                         |           |           |                                                         |                                                         |                                                         |  |
| <input style="width: 40px; height: 20px;" type="text"/>                                     | <input style="width: 40px; height: 20px;" type="text"/>                                                                                                                                                                                                                                                                                                                                                                                                                                            | <input style="width: 40px; height: 20px;" type="text"/>                                                                                                                                                                           |           |           |                                                         |                                                         |                                                         |  |



## STANDARDIZED FOLLOW-UP EVALUATION

---

Preoperative biliary drainage vs. (direct) operation for patients with a pancreatic/periampullary tumor

---

**Date follow-up**

(2 / 6 / 12 weeks after discharge)

| d | d | m | m | y | y | y | y |
|---|---|---|---|---|---|---|---|
|   |   |   |   |   |   |   |   |



**DIAGNOSTICS**

|   |   |   |   |   |   |   |   |
|---|---|---|---|---|---|---|---|
| d | d | m | m | y | y | y | y |
|   |   |   |   |   |   |   |   |

**Laboratory investigations** (on indication only)

- Hemoglobin .....
- Thrombocytes .....
- Leucocytes .....
- C reactive protein .....
- Bilirubin – total .....
- Bilirubin – direct .....
- ALAT (GPT) .....
- ASAT (GOT) .....
- LDH .....
- GGT .....
- AF .....
- Albumin .....
- Amylase .....
- Glucose .....
- Sodium .....
- Potassium .....
- Creatinin .....
- ..... .....
- ..... .....
- ..... .....

**RADIOLOGY**

**Modality Available Date**  
**0=No, 1=Yes**

**CT-scan**

|  |
|--|
|  |
|  |
|  |

|   |   |   |   |   |   |   |   |
|---|---|---|---|---|---|---|---|
| d | d | m | m | y | y | y | y |
|   |   |   |   |   |   |   |   |
|   |   |   |   |   |   |   |   |
|   |   |   |   |   |   |   |   |

**Ultrasound**

**MRI/MRCP**

**other, viz** \_\_\_\_\_

**READMISSION (within 120 days after randomization).**

- Reason of readmission \_\_\_\_\_

- Date of readmission

- Date of discharge

| Date |   |   |   |   |   |   |   |
|------|---|---|---|---|---|---|---|
| d    | d | m | m | y | y | y | y |
|      |   |   |   |   |   |   |   |
|      |   |   |   |   |   |   |   |

- Did the patient die during readmission?

0= No

1= Yes (please mention date)

| Date |   |   |   |   |   |   |   |
|------|---|---|---|---|---|---|---|
| d    | d | m | m | y | y | y | y |
|      |   |   |   |   |   |   |   |
|      |   |   |   |   |   |   |   |

- Intervention?

0= No

1= Yes (please specify)

| Type of intervention & indication | Date |   |   |   |   |   |   |   |
|-----------------------------------|------|---|---|---|---|---|---|---|
|                                   | d    | d | m | m | y | y | y | y |
| 1.                                |      |   |   |   |   |   |   |   |
| 2.                                |      |   |   |   |   |   |   |   |

- Relaparotomy?

0= No

1= Yes (please specify)

| Type of surgery & indication | Date |   |   |   |   |   |   |   |
|------------------------------|------|---|---|---|---|---|---|---|
|                              | d    | d | m | m | y | y | y | y |
| 1.                           |      |   |   |   |   |   |   |   |
| 2.                           |      |   |   |   |   |   |   |   |

## PROTOCOL COMPLICATIONS

- Complications?

0= No

1= Yes (please specify)

- Describe complication(s)

1.

2.

3.

## OTHER COMPLICATIONS

- Complications?

0= No

1= Yes (please specify)

- Describe complication(s)

1.

2.

3.

## ADYUVANT THERAPY

- **Adjuvant radiotherapy?**

0= No

1= Yes (please specify)

| Location for radiation therapy | Dosage  |  |  |  | Start Date |   |   |   | Stop Date |   |   |   |   |   |   |   |   |   |   |   |
|--------------------------------|---------|--|--|--|------------|---|---|---|-----------|---|---|---|---|---|---|---|---|---|---|---|
|                                | (x cGy) |  |  |  | d          | d | m | m | y         | y | y | y | d | d | m | m | y | y | y | y |
| 1.                             |         |  |  |  |            |   |   |   |           |   |   |   |   |   |   |   |   |   |   |   |
| 2.                             |         |  |  |  |            |   |   |   |           |   |   |   |   |   |   |   |   |   |   |   |

- **Adjuvant chemotherapy?**

0= No

1= Yes (if Yes, please specify)

| Type of chemotherapy | Number of courses | Start Date |   |   |   | Stop Date |   |   |   |   |   |   |   |   |   |   |   |
|----------------------|-------------------|------------|---|---|---|-----------|---|---|---|---|---|---|---|---|---|---|---|
|                      |                   | d          | d | m | m | y         | y | y | y | d | d | m | m | y | y | y | y |
| 1.                   |                   |            |   |   |   |           |   |   |   |   |   |   |   |   |   |   |   |
| 2.                   |                   |            |   |   |   |           |   |   |   |   |   |   |   |   |   |   |   |
